# Supplementary material for: The satiating hormone amylin enhances neurogenesis in the area postrema of adult rats
Source: PubMed Central journal article supplement — Mol Metab. 2016 Jul 5;5(10):834–43. doi: 10.1016/j.molmet.2016.06.015 (PMC5034493; doi:10.1016/j.molmet.2016.06.015), 2016-07-05
Supplement: mmc2.pdf [file mmc2.pdf]

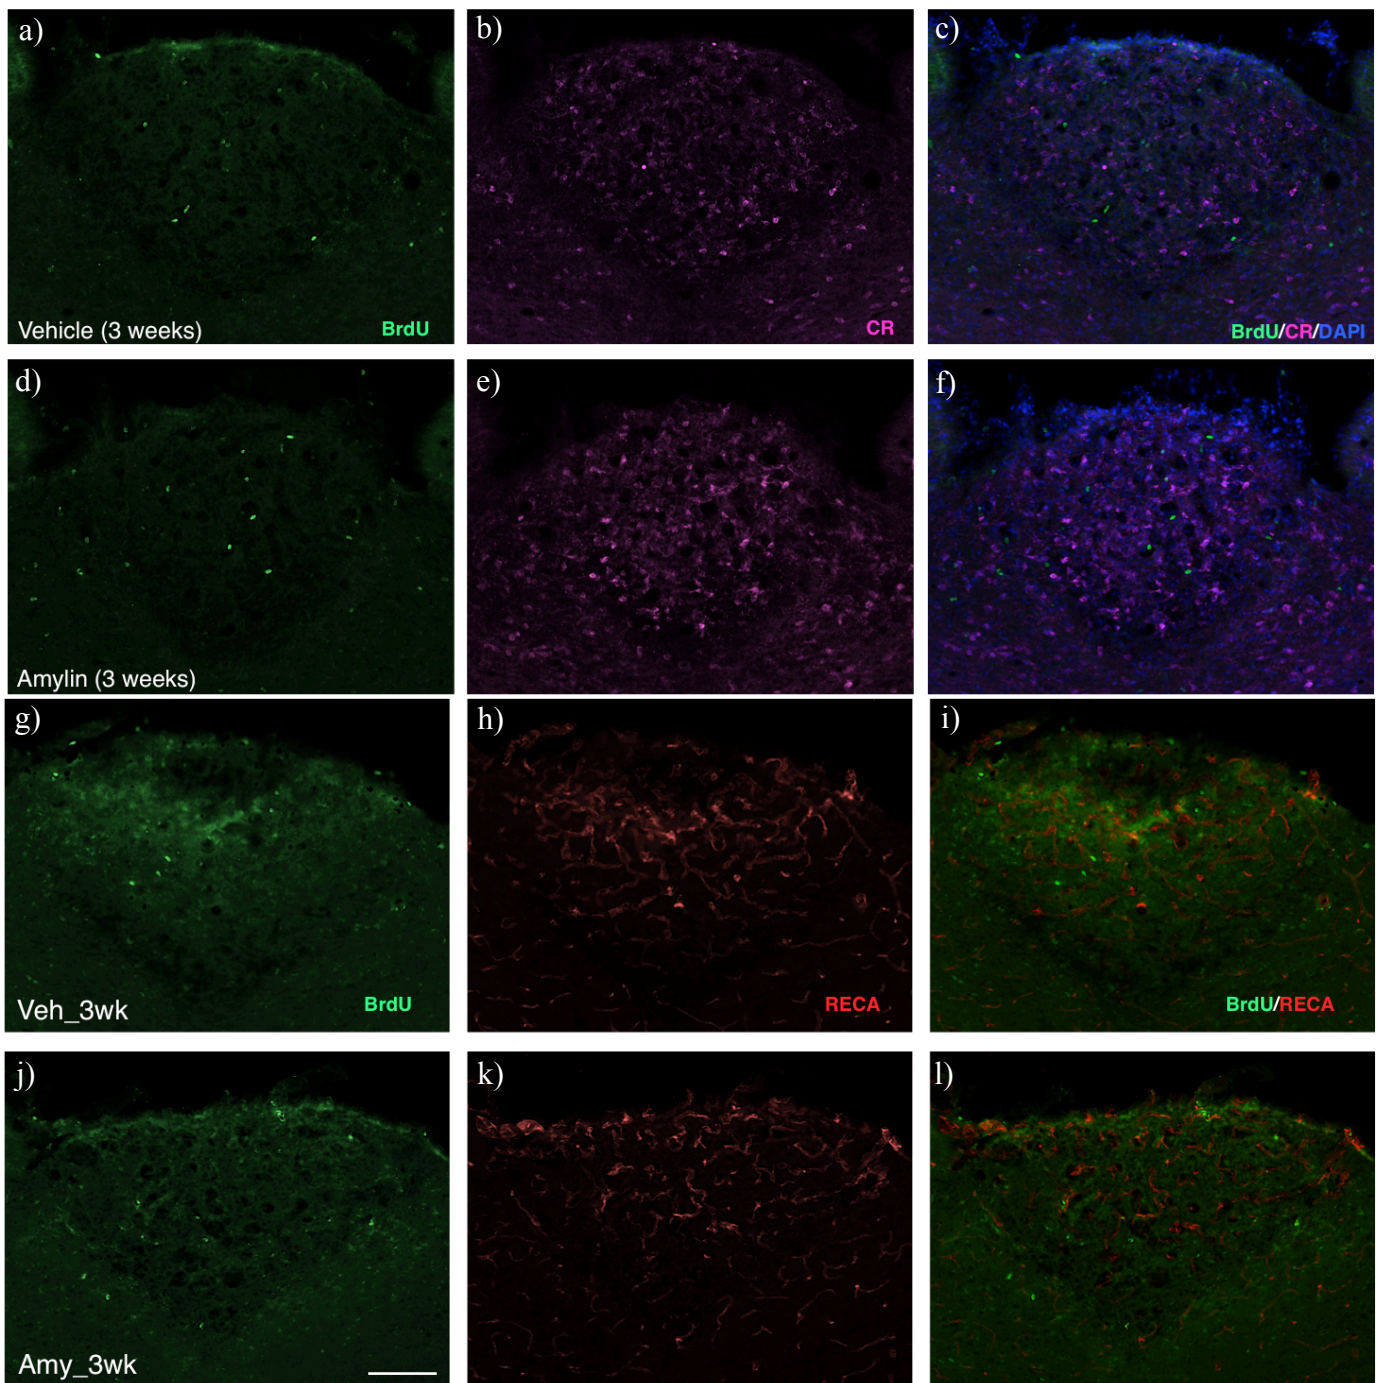

### Supplementary Figure 2

BrdU-labeled cells in the AP of vehicle (a,g) and amylin (d,j) treated rats ( $n = 8$  per group); amylin was given for 3 weeks at a dose of  $50 \mu\text{g}/\text{kg}/\text{d}$ . Sections stained for interneurons (CR) and blood-vessels (RECA-1) markers, respectively, are shown in (b,e,h,k). BrdU-positive neurons double labelled for CR and RECA-1 are shown in (c,f) and (i,l), respectively. No co-localization was observed. Scale bar represents  $50 \mu\text{m}$ .
